# Supplementary material for: Enzalutamide Monotherapy vs Active Surveillance in Patients With Low-risk or Intermediate-risk Localized Prostate Cancer: The ENACT Randomized Clinical Trial
Source: PubMed Central journal article supplement — JAMA Oncol. 2022 Jun 16;8(8):1128–36. doi: 10.1001/jamaoncol.2022.1641 (PMC9204619; doi:10.1001/jamaoncol.2022.1641), 2022-06-16
Supplement: jamaoncol-e221641-s003.pdf [file jamaoncol-e221641-s003.pdf]

## Supplemental Online Content

Shore ND, Renzulli J, Fleshner NE, et al. Enzalutamide monotherapy vs active surveillance in patients with low-risk or intermediate-risk localized prostate cancer: the ENACT randomized clinical trial *JAMA Oncol*. Published online June 16, 2022. doi:10.1001/jamaoncol.2022.1641

**eFigure 1.** Study Design

**eFigure 2.** Time to Prostate Cancer Progression by (A) Pathological and (B) Therapeutic Progression

**eFigure 3.** Time to Pathological or Therapeutic Prostate Cancer Progression by (A) Low and (B) High GS

**eTable 1.** Incidence of Prostate Cancer Progression (Pathological vs. Therapeutic) by Risk (Low vs. Intermediate)

**eTable 2.** Additional Analyses of Primary and Secondary Efficacy Endpoints in Patients With Consistent Biopsy Type

**eTable 3.** Overview of AEs

This supplemental material has been provided by the authors to give readers additional information about their work.

**eFigure 1. Study Design**

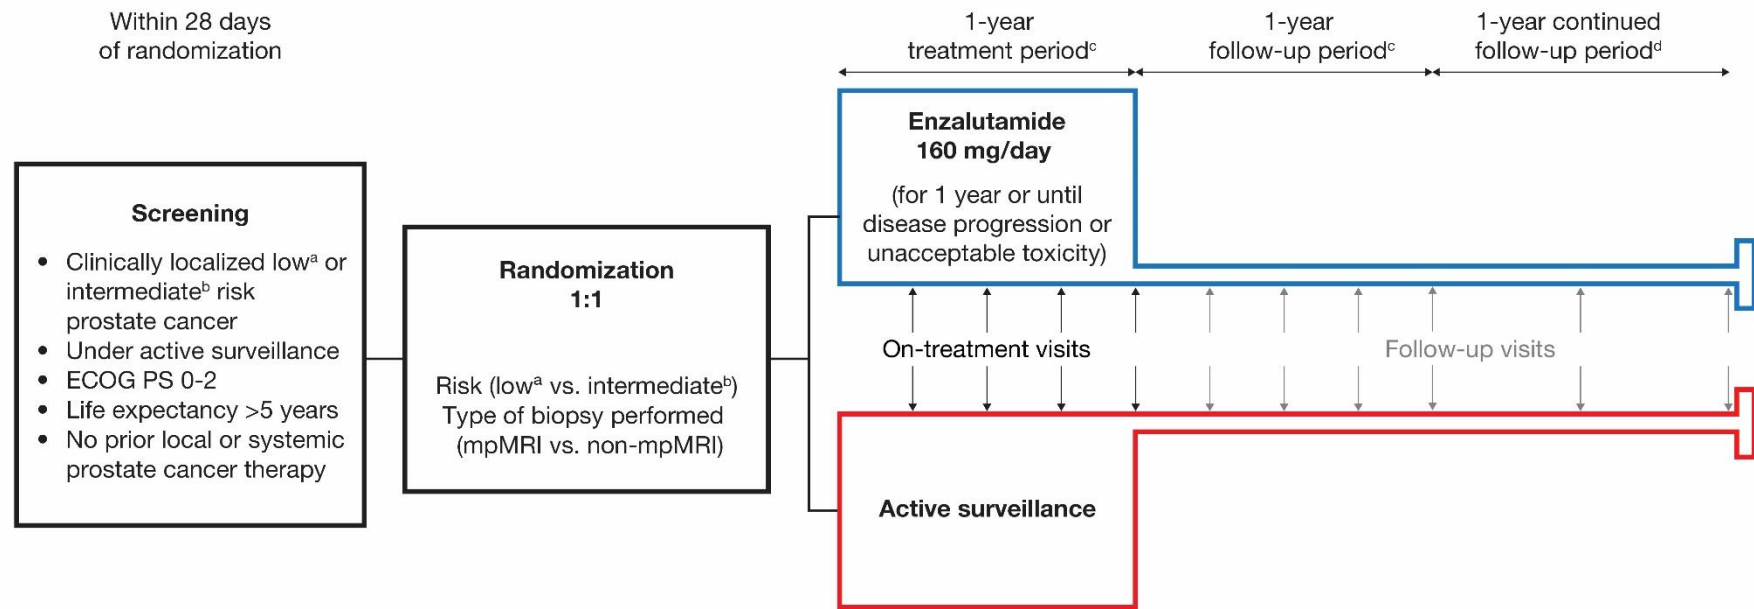

Abbreviations: ECOG PS, Eastern Cooperative Oncology Group Performance Status; GS, Gleason score; mpMRI, multiparametric magnetic resonance imaging; PSA, prostate-specific antigen.

<sup>a</sup>Low risk defined as T1c-T2a, PSA <10 ng/mL, N0, M0, and GS ≤6.

<sup>b</sup>Intermediate risk defined as T2b-T2c, PSA <20 ng/mL, N0, M0, and GS ≤7 (3+4 pattern only).

<sup>c</sup>During the 1-year treatment period and 1-year follow-up period, visits were every 3 months.

<sup>d</sup>During the 1-year continued follow-up period, visits were every 6 months until the last patient completed their 24-month visit.

**eFigure 2. Time to Prostate Cancer Progression by (A) Pathological and (B) Therapeutic Progression**

A

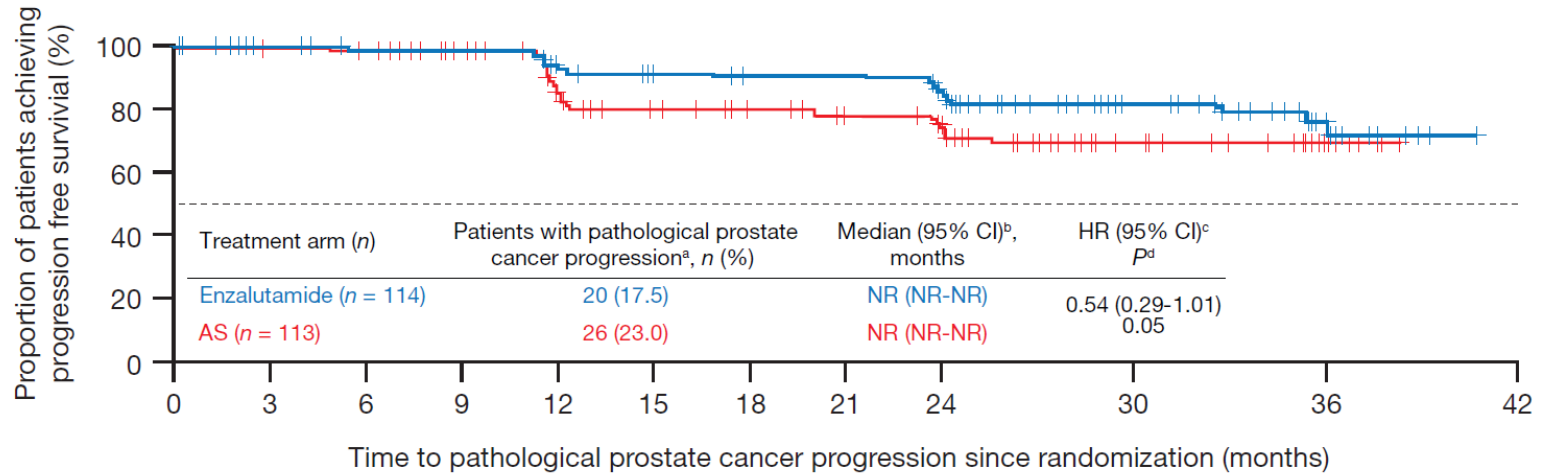

Number of patients at risk

|              |     |     |     |    |    |    |    |    |    |    |    |   |
|--------------|-----|-----|-----|----|----|----|----|----|----|----|----|---|
| Enzalutamide | 113 | 106 | 103 | 99 | 91 | 85 | 81 | 81 | 74 | 40 | 17 | 0 |
| AS           | 113 | 108 | 103 | 95 | 78 | 68 | 62 | 54 | 50 | 28 | 11 | 0 |

B

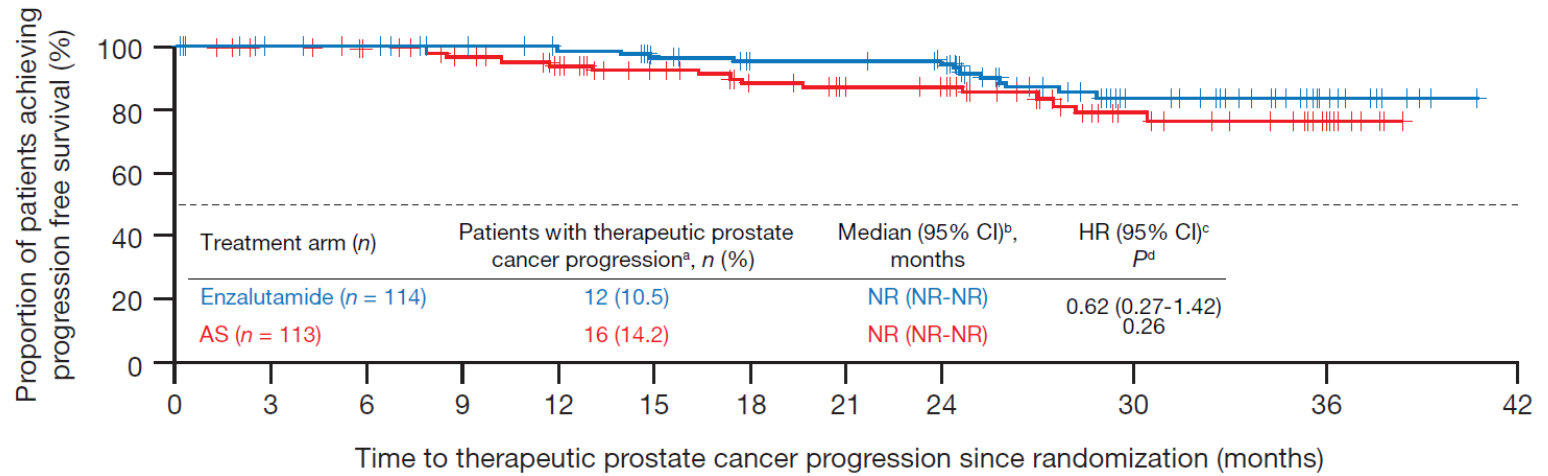

Number of patients at risk

|              |     |     |     |    |    |    |    |    |    |    |    |   |
|--------------|-----|-----|-----|----|----|----|----|----|----|----|----|---|
| Enzalutamide | 113 | 106 | 104 | 99 | 95 | 88 | 81 | 81 | 77 | 41 | 17 | 0 |
| AS           | 113 | 108 | 103 | 96 | 88 | 71 | 63 | 55 | 53 | 29 | 12 | 0 |

Abbreviations: AS, active surveillance; CI, confidence interval; HR, hazard ratio; NR, not reached.

Pathological progression defined as an increase in primary or secondary Gleason score pattern by  $\geq 1$  or higher proportion of cancer-positive cores ( $\geq 15\%$  increase). Therapeutic progression defined as the earliest occurrence of primary therapy for prostate cancer (prostatectomy, radiation, focal therapy, or systemic therapy).

<sup>a</sup>Patients with no prostate cancer progression at the time of study completion, discontinuation, or death were censored at the last assessment date. Patients switching therapy during the study were censored at the time of the initial therapy switch, and patients discontinuing therapy were censored at the time of study discontinuation.

<sup>b</sup>Calculated using a two-sided, log-rank test.

<sup>c</sup>Calculated using a Cox regression model assuming proportional hazards with treatment group, stratification factors, age, race, and time since prostate cancer diagnosis as fixed effects, and study site and patient as random effects. HR  $< 1$  favors enzalutamide.

<sup>d</sup>Calculated using a two-sided, stratified, log-rank test.

**eFigure 3. Time to Pathological or Therapeutic Prostate Cancer Progression by (A) Low and (B) High GS**

A

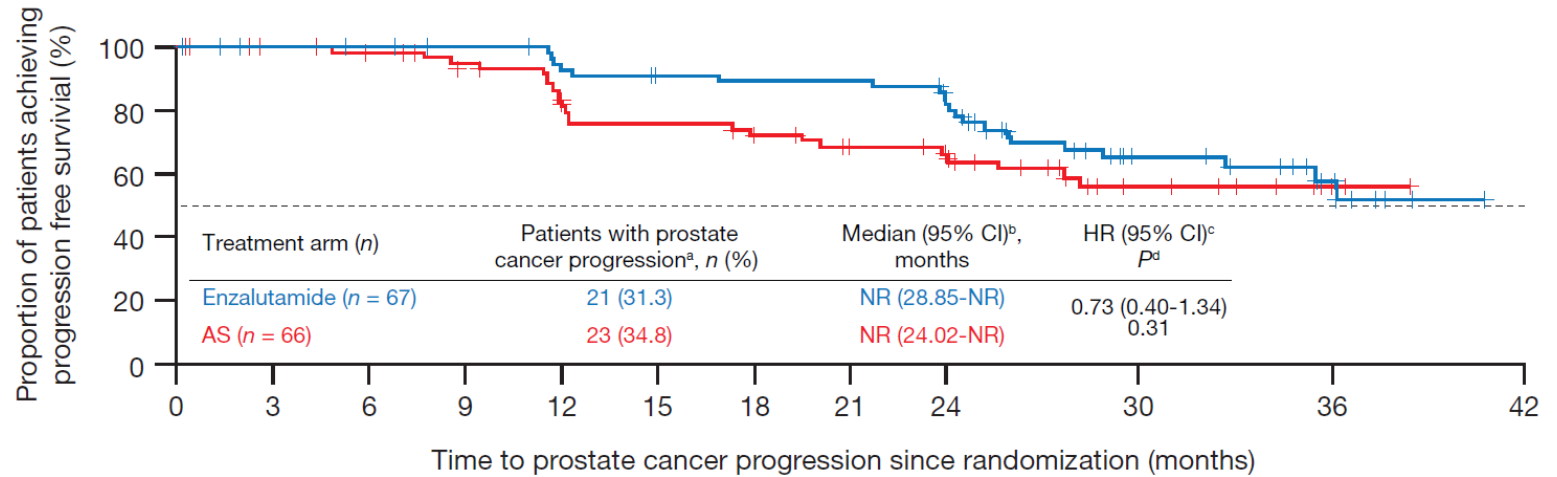

Number of patients at risk

|              |    |    |    |    |    |    |    |    |    |    |    |   |
|--------------|----|----|----|----|----|----|----|----|----|----|----|---|
| Enzalutamide | 66 | 61 | 60 | 58 | 53 | 50 | 49 | 49 | 42 | 23 | 11 | 0 |
| AS           | 66 | 64 | 61 | 55 | 47 | 43 | 39 | 32 | 29 | 15 | 5  | 0 |

B

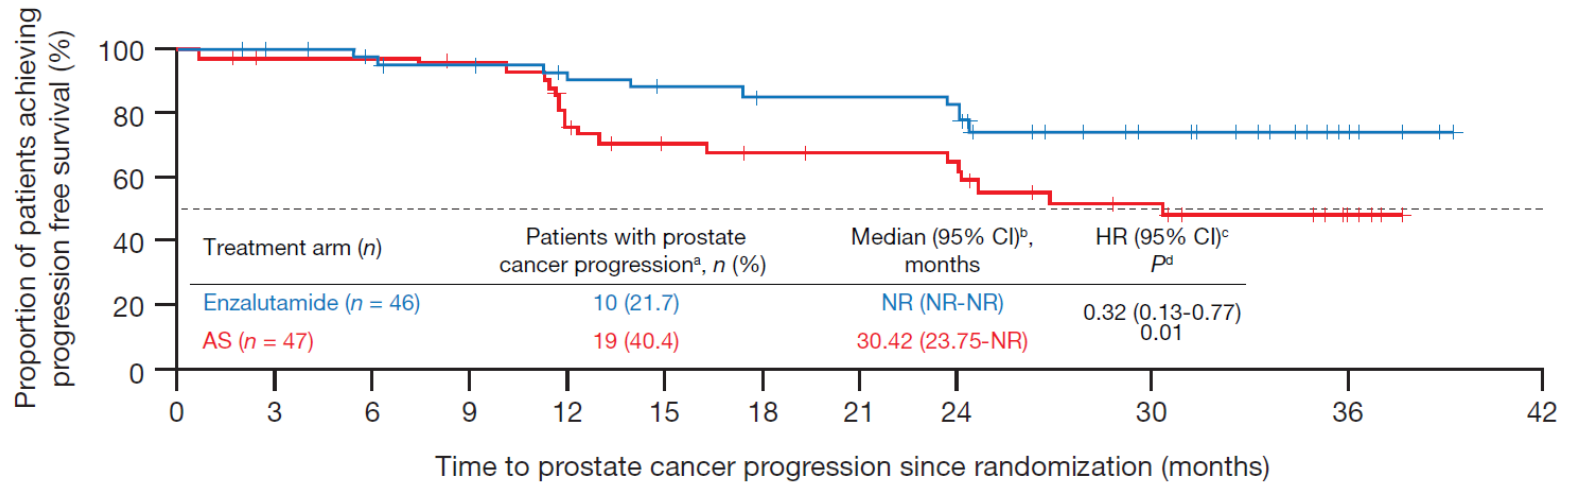

Number of patients at risk

|              |    |    |    |    |    |    |    |    |    |    |   |   |
|--------------|----|----|----|----|----|----|----|----|----|----|---|---|
| Enzalutamide | 46 | 44 | 42 | 40 | 37 | 34 | 32 | 32 | 31 | 17 | 6 | 0 |
| AS           | 47 | 44 | 42 | 40 | 30 | 25 | 23 | 22 | 21 | 13 | 6 | 0 |

Abbreviations: AS, active surveillance; CI, confidence interval; GS, Gleason score; HR, hazard ratio; NR, not reached.

Pathological progression defined as an increase in primary or secondary Gleason pattern by  $\geq 1$  or higher proportion of cancer-positive cores ( $\geq 15\%$  increase). Therapeutic progression defined as the earliest occurrence of primary therapy for prostate cancer (prostatectomy, radiation, focal therapy, or systemic therapy). Low GS defined as a GS of 6. High GS defined as a GS of 7 (3+4 pattern only).

<sup>a</sup>Patients with no prostate cancer progression at the time of study completion, discontinuation, or death were censored at the last assessment date. Patients switching therapy during the study were censored at the time of the initial therapy switch, and patients discontinuing therapy were censored at the time of study discontinuation.

<sup>b</sup>Calculated using a two-sided, log-rank test.

<sup>c</sup>Calculated using a Cox regression model assuming proportional hazards with treatment group, stratification factors, age, race, and time since prostate cancer diagnosis as fixed effects, and study site and patient as random effects. HR  $< 1$  favors enzalutamide.

<sup>d</sup>Calculated using a two-sided, stratified, log-rank test.

**eTable 1. Incidence of Prostate Cancer Progression (Pathological vs. Therapeutic) by Risk (Low vs. Intermediate)**

| <i>n</i> (%)                              | Enzalutamide | AS        |
|-------------------------------------------|--------------|-----------|
| Pathological progression ( <i>n</i> = 46) |              |           |
| Low risk                                  | 11 (23.9)    | 14 (30.4) |
| Intermediate risk                         | 9 (19.6)     | 12 (26.1) |
| Therapeutic progression ( <i>n</i> = 28)  |              |           |
| Low risk                                  | 5 (17.9)     | 5 (17.9)  |
| Intermediate risk                         | 7 (25.0)     | 11 (39.3) |

Abbreviations: AS, active surveillance; GS, Gleason score; PSA, prostate-specific antigen.

Pathological progression defined as an increase in primary or secondary Gleason pattern by  $\geq 1$  or higher proportion of cancer-positive cores ( $\geq 15\%$  increase). Therapeutic progression defined as the earliest occurrence of primary therapy for prostate cancer (prostatectomy, radiation, focal therapy, or systemic therapy). Low-risk prostate cancer defined per National Comprehensive Cancer Network guidelines as T1c-T2a, PSA  $< 10$  ng/mL, N0, M0, and GS  $\leq 6$ . Intermediate-risk prostate cancer defined per National Comprehensive Cancer Network guidelines as T2b-T2c, PSA  $< 20$  ng/mL, N0, M0, and GS  $\leq 7$  (3+4 pattern only).

**eTable 2. Additional Analyses of Primary and Secondary Efficacy Endpoints in Patients With Consistent Biopsy Type**

| <b>Endpoint</b>                                                                 | <b>Enzalutamide</b> | <b>AS</b>        |
|---------------------------------------------------------------------------------|---------------------|------------------|
| Time to pathological or therapeutic prostate cancer progression                 | <i>n</i> = 96       | <i>n</i> = 81    |
| Progression events <sup>a</sup> , <i>n</i> (%)                                  | 22 (22.9)           | 27 (33.3)        |
| Median (95% CI) <sup>b</sup>                                                    | NR (36.14-NR)       | NR (25.59-NR)    |
| HR (95% CI) <sup>c</sup>                                                        |                     | 0.45 (0.24-0.84) |
| <i>P</i> <sup>d</sup>                                                           |                     | <b>.01</b>       |
| Incidence of pathological or therapeutic prostate cancer progression at 1 year  | <i>n</i> = 95       | <i>n</i> = 81    |
| Progression events, <i>n</i> (%)                                                | 8 (8.3)             | 19 (23.5)        |
| OR <sup>e</sup> (95% CI) <sup>f</sup>                                           |                     | 0.2 (0.09-0.60)  |
| <i>P</i> <sup>f</sup>                                                           |                     | <b>&lt;.01</b>   |
| Incidence of pathological or therapeutic prostate cancer progression at 2 years | <i>n</i> = 78       | <i>n</i> = 44    |
| Progression events, <i>n</i> (%)                                                | 10 (12.8)           | 5 (11.4)         |
| OR <sup>e</sup> (95% CI) <sup>f</sup>                                           |                     | 1.1 (0.31-3.57)  |
| <i>P</i> <sup>f</sup>                                                           |                     | 0.93             |
| Incidence of negative biopsy at 1 year                                          | <i>n</i> = 96       | <i>n</i> = 81    |
| Biopsy result, <i>n</i> (%)                                                     |                     |                  |
| Negative                                                                        | 31 (32.3)           | 10 (12.3)        |



| <b>Endpoint</b>                                             | <b>Enzalutamide</b>           | <b>AS</b>                    |
|-------------------------------------------------------------|-------------------------------|------------------------------|
| Positive                                                    | 44 (45.8)                     | 50 (61.7)                    |
| Unknown                                                     | 21 (21.9)                     | 21 (25.9)                    |
| OR <sup>e</sup> (95% CI) <sup>g</sup>                       | 3.5 (1.54-8.08)               |                              |
| <i>p</i> <sup>h</sup>                                       | <b>&lt;.01</b>                |                              |
| Incidence of negative biopsy at 2 years                     | <i>n</i> = 84                 | <i>n</i> = 53                |
| Biopsy result, <i>n</i> (%)                                 |                               |                              |
| Negative                                                    | 18 (21.4)                     | 8 (15.1)                     |
| Positive                                                    | 38 (45.2)                     | 25 (47.2)                    |
| Unknown                                                     | 28 (33.3)                     | 20 (37.7)                    |
| OR <sup>e</sup> (95% CI) <sup>g</sup>                       | 1.5 (0.53-4.12)               |                              |
| <i>p</i> <sup>h</sup>                                       | 0.44                          |                              |
| Percentage of cancer-positive cores at 1 year <sup>i</sup>  | <i>n</i> = 74                 | <i>n</i> = 53                |
| LS mean change from baseline ± SE <sup>j</sup> (95% CI)     | -13.19 ± 2.61 (-18.34, -8.04) | -4.77 ± 2.70 (-10.10, 0.56)  |
| Difference in LS means ± SE (95% CI)                        | -8.42 ± 2.59 (-13.52, -3.32)  |                              |
| <i>p</i> <sup>k</sup>                                       | <b>&lt;.01</b>                |                              |
| Percentage of cancer-positive cores at 2 years <sup>i</sup> | <i>n</i> = 43                 | <i>n</i> = 29                |
| LS mean change from baseline ± SE <sup>j</sup> (95% CI)     | -6.19 ± 3.01 (-12.14, -0.25)  | -6.25 ± 3.09 (-12.35, -0.15) |
| Difference in LS means ± SE (95% CI)                        | 0.06 ± 3.47 (-6.79, 6.90)     |                              |

| <b>Endpoint</b>                                       | <b>Enzalutamide</b> | <b>AS</b>         |
|-------------------------------------------------------|---------------------|-------------------|
| <i>p</i> <sup>k</sup>                                 |                     | .99               |
| Time to PSA progression                               | <i>n</i> = 96       | <i>n</i> = 81     |
| Progression events <sup>a</sup> , <i>n</i> (%)        | 79 (82.3)           | 66 (81.5)         |
| Median (95% CI) <sup>b</sup>                          | 14.82 (14.75-14.95) | 8.77 (6.05-11.53) |
| HR (95% CI) <sup>c</sup>                              |                     | 0.58 (0.40-0.84)  |
| <i>p</i> <sup>d</sup>                                 |                     | <b>&lt;.01</b>    |
| Incidence of a secondary rise in serum PSA at 1 year  | <i>n</i> = 96       | <i>n</i> = 81     |
| PSA response <sup>l</sup> , <i>n</i> (%)              | 26 (27.1)           | 56 (69.1)         |
| OR <sup>e</sup> (95% CI) <sup>g</sup>                 |                     | 0.2 (0.08-0.31)   |
| <i>p</i> <sup>h</sup>                                 |                     | <b>&lt;.001</b>   |
| Incidence of a secondary rise in serum PSA at 2 years | <i>n</i> = 84       | <i>n</i> = 53     |
| PSA response <sup>l</sup> , <i>n</i> (%)              | 77 (91.7)           | 51 (96.2)         |
| OR <sup>e</sup> (95% CI) <sup>g</sup>                 |                     | 0.7 (0.15-2.94)   |
| <i>p</i> <sup>h</sup>                                 |                     | 0.59              |

Abbreviations: AS, active surveillance; CI, confidence interval; HR, hazard ratio; LS, least squares; NR, not reached; OR, odds ratio; PSA, prostate-specific antigen; SE, standard error.

Analyses performed in patients with consistent biopsy type at screening, month 12, and month 24, or screening and month 12, or screening and month 24, or those with just a screening biopsy and no follow-up biopsy. Pathological progression defined as an increase in primary or secondary Gleason pattern by  $\geq 1$  or higher proportion of cancer-positive cores ( $\geq 15\%$  increase). Therapeutic progression defined as the earliest occurrence of primary therapy for prostate cancer (prostatectomy, radiation, focal therapy, or systemic therapy).

<sup>a</sup>Patients with no prostate cancer progression at the time of study completion, discontinuation, or death were censored at the last assessment date. Patients switching therapy during the study were censored at the time of the initial therapy switch and patients discontinuing therapy were censored at the time of study discontinuation.

<sup>b</sup> Calculated using a two-sided, log-rank test.

<sup>c</sup> Calculated using a Cox regression model assuming proportional hazards with treatment group, stratification factors, age, race, and time since prostate cancer diagnosis as fixed effects, and study site and patient as random effects. HR <1 favors enzalutamide.

<sup>d</sup> Calculated using a two-sided, stratified, log-rank test.

<sup>e</sup> Calculated using an exact logistic regression model with treatment group, stratification factors, age, race, and time since prostate cancer diagnosis as fixed effects, and study site and patient as random effects.

<sup>f</sup> Calculated based on Wald's Chi-square from the logistic regression model.

<sup>g</sup> Calculated based on exact binomial distribution.

<sup>h</sup> Calculated based on exact binomial distribution from the logistic regression model.

<sup>i</sup> Analyzed using a mixed-model-repeated-measures model, with treatment group, stratification factors, visit, visit-by-treatment, and baseline score as fixed effects, and study site and patient as random effects.

<sup>j</sup> Most recent biopsy taken during the 6 months prior to screening.

<sup>k</sup> Bonferroni-Holm used to adjust for multiplicity.

<sup>l</sup> PSA response defined as a secondary rise in serum PSA  $\geq 25\%$  of baseline, or  $\geq 25\%$  above nadir, or an absolute increase of  $\geq 2$  ng/mL.

**eTable 3. Overview of AEs**

| <i>n</i> (%)                                                                                    | During 1-year treatment period <sup>a</sup> |                      | During 1-year follow-up period <sup>b</sup> |                      | During 1-year continued follow-up period <sup>c</sup> |                      |
|-------------------------------------------------------------------------------------------------|---------------------------------------------|----------------------|---------------------------------------------|----------------------|-------------------------------------------------------|----------------------|
|                                                                                                 | Enzalutamide<br><i>n</i> = 112              | AS<br><i>n</i> = 113 | Enzalutamide<br><i>n</i> = 112              | AS<br><i>n</i> = 113 | Enzalutamide<br><i>n</i> = 112                        | AS<br><i>n</i> = 113 |
| AEs                                                                                             | 103 (92.0)                                  | 62 (54.9)            | 44 (39.3)                                   | 26 (23.0)            | 16 (14.3)                                             | 12 (10.6)            |
| SAEs                                                                                            | 9 (8.0)                                     | 5 (4.4)              | 8 (7.1)                                     | 3 (2.7)              | 4 (3.6)                                               | 2 (1.8)              |
| AEs leading to death                                                                            | 1 (0.9)                                     | 0                    | 0                                           | 0                    | 2 (1.8)                                               | 0                    |
| Drug-related AEs                                                                                | 99 (88.4)                                   | N/A                  | N/A                                         | N/A                  | N/A                                                   | N/A                  |
| Drug-related SAEs                                                                               | 3 (2.7)                                     | N/A                  | N/A                                         | N/A                  | N/A                                                   | N/A                  |
| Drug-related AEs leading to discontinuation of study drug                                       | 8 (7.1)                                     | N/A                  | N/A                                         | N/A                  | N/A                                                   | N/A                  |
| <b>AEs reported in ≥5% of patients in any treatment arm during any study period<sup>d</sup></b> |                                             |                      |                                             |                      |                                                       |                      |
| Fatigue                                                                                         | 62 (55.4)                                   | 4 (3.5)              | 2 (1.8)                                     | 1 (0.9)              | 0                                                     | 0                    |
| Gynecomastia                                                                                    | 41 (36.6)                                   | 2 (1.8)              | 2 (1.8)                                     | 1 (0.9)              | 0                                                     | 0                    |
| Nipple pain                                                                                     | 34 (30.4)                                   | 0                    | 0                                           | 0                    | 0                                                     | 0                    |
| Breast tenderness                                                                               | 26 (25.9)                                   | 1 (0.9)              | 0                                           | 0                    | 0                                                     | 0                    |
| Erectile dysfunction                                                                            | 20 (17.9)                                   | 2 (1.8)              | 2 (1.8)                                     | 2 (1.8)              | 0                                                     | 0                    |
| Alopecia                                                                                        | 11 (9.8)                                    | 0                    | 0                                           | 0                    | 0                                                     | 0                    |
| Decreased libido                                                                                | 9 (8.0)                                     | 1 (0.9)              | 1 (0.9)                                     | 0                    | 0                                                     | 0                    |

| <i>n</i> (%)                      | During 1-year treatment period <sup>a</sup> |                      | During 1-year follow-up period <sup>b</sup> |                      | During 1-year continued follow-up period <sup>c</sup> |                      |
|-----------------------------------|---------------------------------------------|----------------------|---------------------------------------------|----------------------|-------------------------------------------------------|----------------------|
|                                   | Enzalutamide<br><i>n</i> = 112              | AS<br><i>n</i> = 113 | Enzalutamide<br><i>n</i> = 112              | AS<br><i>n</i> = 113 | Enzalutamide<br><i>n</i> = 112                        | AS<br><i>n</i> = 113 |
| Hypertension                      | 8 (7.1)                                     | 8 (7.1)              | 2 (1.8)                                     | 5 (4.4)              | 1 (0.9)                                               | 1 (0.9)              |
| Breast enlargement                | 7 (6.3)                                     | 0                    | 0                                           | 0                    | 0                                                     | 0                    |
| Diarrhea                          | 6 (5.4)                                     | 0                    | 0                                           | 1 (0.9)              | 0                                                     | 0                    |
| Hot flush                         | 6 (5.4)                                     | 0                    | 0                                           | 0                    | 0                                                     | 0                    |
| Nausea                            | 6 (5.4)                                     | 0                    | 1 (0.9)                                     | 1 (0.9)              | 0                                                     | 0                    |
| Pollakiuria                       | 6 (5.4)                                     | 4 (3.5)              | 1 (0.9)                                     | 0                    | 1 (0.9)                                               | 0                    |
| Upper respiratory tract infection | 6 (5.4)                                     | 4 (3.5)              | 6 (5.4)                                     | 1 (0.9)              | 1 (0.9)                                               | 1 (0.9)              |
| Weight decreased                  | 6 (5.4)                                     | 0                    | 0                                           | 1 (0.9)              | 0                                                     | 1 (0.9)              |

Abbreviations: AE, adverse event; AS, active surveillance; N/A, not applicable; NR, not reported; SAE, serious adverse events.

<sup>a</sup>From date of first dose (enzalutamide) or randomization (AS) until date discontinued or completed 12 months on study + 30 days.

<sup>b</sup>From date completed 12 months on study + 31 days until date discontinued or completed 24 months on study.

<sup>c</sup>From date completed 24 months on study + 1 day until date discontinued or completed study.

<sup>d</sup>AEs coded using Medical Dictionary for Regulatory Activities, version 23.0.
